# Supplementary material
Source: MDPI journal article supplement (https://www.mdpi.com/2673-6373/1/4/28)
Supplement: s1 [file s1 › oral-1334996-supplementary.pdf]

## Supplemental Materials

|                                                                     |
|---------------------------------------------------------------------|
| <b>CARIES-QC items</b>                                              |
| How much do your teeth hurt you?                                    |
| Do your teeth make it hard to eat some foods?                       |
| Do you have to eat on one side of your mouth because of your teeth? |
| Do you get food stuck in your teeth?                                |
| How much do you get kept awake by your teeth?                       |
| How much do your teeth annoy you?                                   |
| How much do your teeth hurt when you brush them?                    |
| Do you have to eat more carefully because of your teeth?            |
| Do you have to eat more slowly because of your teeth?               |
| Do you feel cross because of your teeth?                            |
| How much have you cried because of your teeth?                      |
| Do your teeth make it hard to do your schoolwork?                   |
| Global question: How much of a problem are your teeth for you?      |
